# Neurosteroids and Female Reproduction: Estrogen Increases $3\beta$ -HSD mRNA and Activity in Rat Hypothalamus

K. K. Soma, K. Sinchak, A. Lakhter, B. A. Schlinger, and P. E. Micevych

Departments of Psychology and Zoology (K.K.S.), Graduate Program in Neuroscience, University of British Columbia, Vancouver, British Columbia, Canada V6T 1Z4; and Department of Neurobiology (K.S., A.L., P.E.M.), David Geffen School of Medicine at University of California, Los Angeles, and Department of Physiological Science (B.A.S.), Laboratory of Neuroendocrinology (B.A.S., P.E.M.), Brain Research Institute, University of California, Los Angeles, Los Angeles, California 90091

A central event in mammalian reproduction is the LH surge that induces ovulation and corpus luteum formation. Typically, the LH surge is initiated in ovariectomized rats by sequential treatment with estrogen and progesterone (PROG). The traditional explanation for this paradigm is that estrogen induces PROG receptors (PR) that are activated by exogenous PROG. Recent evidence suggests that whereas exogenous estrogen is necessary, exogenous PROG is not. In ovariectomized-adrenalectomized rats, estrogen treatment increases hypothalamic PROG levels before an LH surge. This estrogen-induced LH surge was blocked by an inhibitor of  $3\beta$ -hydroxysteroid dehydrogenase/ $\Delta 5$ - $\Delta 4$  isomerase ( $3\beta$ -HSD), the proximal enzyme for PROG synthesis. These data indicate that estrogen induces *de novo* synthesis of PROG from cholesterol in the hypothalamus, which initiates the LH surge. The mechanism(s) by which estrogen up-regulates neuro-PROG is un-

known. We investigated whether estrogen increases 1) mRNA levels for several proteins involved in PROG synthesis and/or 2) activity of  $3\beta$ -HSD in the hypothalamus. In ovariectomized-adrenalectomized rats, estrogen treatment increased  $3\beta$ -HSD mRNA in the hypothalamus, as measured by relative quantitative RT-PCR. The mRNAs for other proteins involved in steroid synthesis (sterol carrier protein 2, steroidogenic acute regulatory protein, and P450 side chain cleavage) were detectable in hypothalamus but not affected by estrogen. In a biochemical assay, estrogen treatment also increased  $3\beta$ -HSD activity. These data support the hypothesis that PROG is a neurosteroid, produced locally in the hypothalamus from cholesterol, which functions in the estrogen positive-feedback mechanism driving the LH surge. (*Endocrinology* 146: 4386–4390, 2005)

ONE OF THE important questions confronting neuroendocrinology is the relationship between steroids produced by peripheral steroidogenic organs (*e.g.* adrenals and gonads) and steroids produced by the central nervous system, neurosteroids (1). We have demonstrated that systemic estrogen treatment of ovariectomized and adrenalectomized (OVX-ADX) rats increases hypothalamic progesterone (PROG) levels (2). The estrogen-induced increase of neuro-PROG precedes the LH surge, and the LH surge is blocked by an inhibitor of  $3\beta$ -hydroxysteroid dehydrogenase/ $\Delta 5$ - $\Delta 4$  isomerase ( $3\beta$ -HSD), the enzyme that converts pregnenolone to PROG (2). These data suggest that *de novo* synthesis of PROG from cholesterol in the hypothalamus is a critical part of the estrogen positive-feedback mechanism that stimulates the LH surge.

All cell types in the nervous system, particularly macroglia, have steroidogenic potential (3, 4). Astrocytes have high

levels of P450 side chain cleavage (P450scc) (5, 6) and predominantly synthesize and secrete PROG (7, 8). Astrocytes also express estrogen receptor- $\alpha$  (ER $\alpha$ ) and ER $\beta$  (9, 10), suggesting that estrogen could stimulate PROG synthesis in these cells. Indeed, in enriched cultures of neonatal cortical astrocytes, PROG levels in media increase in response to estrogen treatment (8). Furthermore, astrocytes cultured from the hypothalamus respond to estrogen with increased PROG synthesis, but only after puberty (11). Although there is no evidence to date, *in vivo*, it remains possible that estrogen might stimulate neuro-PROG synthesis in neurons.

Proteins involved in steroidogenesis are expressed in a region-specific manner in the brain. For example, both sterol carrier protein 2 (SCP-2) and steroidogenic acute regulatory protein (StAR) are expressed in the hypothalamus and other regions (12–14). SCP-2 is involved in intracellular transport of cholesterol to mitochondria (12). StAR, considered to be the rate-limiting step in steroidogenesis, transports cholesterol from the outer to the inner mitochondrial membrane (13). On the inner mitochondrial membrane, P450scc converts cholesterol to pregnenolone, and then  $3\beta$ -HSD metabolizes pregnenolone to PROG in the endoplasmic reticulum. Whether estrogen regulates these four proteins to increase neuro-PROG levels remains unclear (2).

The present study examines whether estrogen regulates the expression of cholesterol transport proteins and steroidogenic enzymes in the hypothalamus. We used OVX-ADX

First Published Online July 14, 2005

Abbreviations: Ct, Threshold cycle; EB, estradiol benzoate; ER $\alpha$ , estrogen receptor- $\alpha$ ;  $3\beta$ -HSD,  $3\beta$ -hydroxysteroid dehydrogenase/ $\Delta 5$ - $\Delta 4$  isomerase; OVX-ADX, ovariectomized and adrenalectomized; P450scc, P450 side chain cleavage; PLSD, protected least significant difference; PR, progesterone receptor; PROG, progesterone; SCP-2, sterol carrier protein 2; StAR, steroidogenic acute regulatory protein.

*Endocrinology* is published monthly by The Endocrine Society (<http://www.endo-society.org>), the foremost professional society serving the endocrine community.

rats treated with estrogen and collected tissue at various times after treatment to establish a time course of estrogen stimulation of mRNA expression of steroidogenic proteins. Relative quantitative RT-PCR was used to measure levels of SCP-2, StAR, P450scc, and 3 $\beta$ -HSD mRNAs. In a parallel experiment, we used a biochemical assay to measure the effects of estrogen treatment on 3 $\beta$ -HSD activity.

## Materials and Methods

### Animals

Experimental procedures were approved by the Chancellor's Animal Research Committee at University of California, Los Angeles. Animals in this study were adult Long-Evans female rats weighing 200–225 g (Charles River Laboratories, Raleigh, NC). Animals were ovariectomized and adrenalectomized by the supplier. Food and water were provided *ad libitum*. Drinking water included 0.9% sodium chloride and corticosterone (50 mg/liter). Corticosterone is synthesized from PROG, but this is considered an irreversible reaction under physiological conditions. Thus, neuro-PROG is unlikely to be derived from exogenous corticosterone. In addition, previous studies indicate that circulating levels of PROG are basal in OVX-ADX rats given corticosterone in the drinking water (2). The animals were maintained on a 12-h light, 12-h dark cycle, with lights on at 0600 h. Steroid treatments were started between 28 and 35 d after ovariectomy and adrenalectomy, as in previous studies (2). Separate sets of rats were used for mRNA expression and enzyme activity studies.

### Measurement of mRNA

All rats were housed two per cage and acclimated to handling by being handled at least once per day for 1 wk before the experiment. On d 1, rats were treated sc with 50  $\mu$ g 17 $\beta$ -estradiol benzoate (EB) (Sigma Chemical Co., St. Louis, MO) in 0.1 ml safflower oil or with oil vehicle at noon. Rats treated with oil vehicle were anesthetized and decapitated immediately (0-h group, n = 6). Rats treated with EB were anesthetized and decapitated 12 h (n = 5), 24 h (n = 5), or 44 h (n = 5) later. Brains were quickly removed and briefly chilled in ice-cold RNase-free PBS. The hypothalamus-preoptic area was quickly dissected on ice. The rostral limit of the hypothalamus-preoptic area dissection contained the anteroventral periventricular nucleus (AVPV), and the caudal limit was at the rostral pole of the mammillary bodies. The dorsal limit was at the dorsal apex of the third ventricle, and the lateral limits were at the lateral edges of the medial preoptic area. Tissue blocks were frozen immediately on dry ice and stored at –80 C.

The mRNA levels of SCP-2, StAR, P450scc, 3 $\beta$ -HSD (type I), and PROG receptors (PR) were measured by relative quantitative RT-PCR. Because PR mRNA levels are increased after estrogen treatment (15), PR mRNA served as a positive control for EB treatment. Two sets of PCR primers for PR were used; one set recognized both PR-A and PR-B isoforms, and a second set recognized only PR-B (16).  $\beta$ -Actin was used

as an endogenous housekeeping gene for normalization. Total RNA was isolated from tissue using Absolutely RNA RT-PCR Miniprep Kit (Stratagene, La Jolla, CA) and included DNase treatment. RNA integrity was confirmed by 1.2% agarose gel electrophoresis. Single-stranded cDNA was synthesized from total RNA using SuperScript III First-Strand Synthesis System for RT-PCR (Invitrogen Corp., Carlsbad, CA).

The cDNA was subjected to PCR. SYBR Green or TaqMan chemistries were used with primers described in Table 1. Primers and probes were designed using Primer3 software (The Whitehead Institute, Boston, MA). Primers for PR were published previously (16). For measurement of StAR mRNA only, a TaqMan probe was used (HEX-TGC TAC CAT GTA GGC AGA CAG GAG TT-BHQ1). Primer and probe specificities were confirmed by a BLAST software-assisted search of a nonredundant nucleotide sequence database (National Library of Medicine, Bethesda, MD). Template dilutions using hypothalamic cDNA determined the efficiency of amplification for all mRNA examined. Melting curve analyses, agarose gel electrophoresis, and/or sequencing of PCR products confirmed PCR product specificity. The experiments were conducted on an Mx3000p Real-Time PCR System (Stratagene). Samples were run in triplicate, and positive controls (ovarian cDNA) and negative controls (no cDNA) were included in every PCR run.

Relative gene expression data were calculated using the comparative threshold cycle (Ct) method (Applied Biosystems User Bulletin 2, 2001). Briefly, the Ct was determined for each gene of interest. Within each subject,  $\Delta$ Ct was calculated as the difference in Ct between target mRNA and  $\beta$ -actin mRNA.  $\Delta\Delta$ Ct was calculated as the difference between  $\Delta$ Ct for each sample and the average  $\Delta$ Ct for the 0-h group (baseline). The change in target mRNA, relative to baseline, was calculated as  $2^{-\Delta\Delta Ct}$ . Changes in mRNA expression were expressed as a percentage of the 0-h group.

### Measurement of 3 $\beta$ -HSD activity

A separate set of rats was used to measure 3 $\beta$ -HSD activity. On d 1, rats were treated sc with 50  $\mu$ g EB (in 0.1 ml safflower oil) or oil vehicle at noon and were returned to their home cages. Rats were killed 2 or 44 h after treatment. Rats were rapidly anesthetized with isoflurane and decapitated within 3 min of removal from their cages. This was done to avoid rapid effects of stress on 3 $\beta$ -HSD activity (17). The brain was immediately removed and briefly chilled in ice-cold PBS. A hypothalamic-preoptic area block was dissected as described above. In addition, an amygdaloid block was collected because this area has high 3 $\beta$ -HSD activity (18). The amygdaloid block extended rostrocaudally from the medial amygdala, anterodorsal to the medial amygdala, and posterodorsal where the lateral ventricle emerges. The medial border paralleled the optic tract and the lateral border was a parallel cut on the lateral limit of the lateral amygdala. Perpendicular cuts to the previously described cuts were made just dorsal to the central amygdala and ventral to the basal medial amygdala. Tissue was frozen on dry ice and stored at –80 C.

3 $\beta$ -HSD activity was measured using an *in vitro* assay that quantifies the conversion of [ $^3$ H]pregnenolone to [ $^3$ H]PROG using thin layer chromatography (TLC) (19, 20). The assay methods were based on previous

**TABLE 1.** Primer sequences for relative quantitative RT-PCR

|                         | Primers                                                                     | GenBank accession no. |
|-------------------------|-----------------------------------------------------------------------------|-----------------------|
| $\beta$ -Actin          | FW: AGG GAA ATC GTG CGT GAC AT<br>RV: TCC AGG GAG GAA GAG GAT GC            | NM_031144             |
| PR-A/B                  | FW: CTT TGT TTC CTC TGC AAA AAT TG<br>RV: GTA TAC ACG TAA GGC TTT CAG AAG G | NA                    |
| PR-B                    | FW: CAG ACC AAC CTG CAA CCA GAA<br>RV: AGT CCT CAC CAA AAC CCT GGG          | U06637/L16921         |
| SCP-2                   | FW: AGG GGA TGG ATT CAA GGC<br>RV: CAC GAA CTC TTC CCC TTC C                | NM_138508             |
| StAR                    | FW: TCA GAG TAG CAG CTC CCT TGT TTG<br>RV: CTC CAA ATC CTG AAA CCG GAA TGC  | NM_031558             |
| P450scc                 | FW: CAG CGG TTC ATC GAC GC<br>RV: TCT GGA GGC ATG TTG AGC A                 | J05156                |
| 3 $\beta$ -HSD (type I) | FW: CCC ATA CAG CAA AAG GAT GG<br>RV: GCC GCA AGT ATC ATG ACA GA            | M38178                |

FW, Forward; RV, reverse; NA, not applicable.

studies, in which results using TLC were verified by gas chromatography-mass spectrometry (20). Briefly, tissue was homogenized in 300  $\mu$ l ice-cold sucrose-phosphate buffer with a glass-Teflon homogenizer. Homogenates were centrifuged for 30 min at 1000  $\times$  g at 4 C. Supernatants (180  $\mu$ l) were incubated with [ $^3$ H]pregnenolone (800 nM) (NEN Life Science Products, Boston, MA). [ $^3$ H]pregnenolone was repurified before use. Incubations included the cofactor nicotinamide adenine dinucleotide (20  $\mu$ l; 1 mM final concentration). Radioinert PROG cold trap (800 nM) (Steraloids, Newport, RI) was included in the incubation to reduce the metabolism of formed [ $^3$ H]PROG. Control tubes contained everything but tissue. Incubations were carried out for 60 min at 37 C with shaking. This incubation duration was based on previous studies in rat sciatic nerve (20, 21), songbird hypothalamus and telencephalon (17), and our preliminary studies. Reactions were terminated by snap freezing. To correct for procedural losses, tubes containing a known amount of [ $^3$ H]PROG were processed in parallel.

Steroids were extracted using diethyl ether (three times). Radioinert pregnenolone, PROG, and  $5\alpha$ -dihydroprogesterone were added as markers, and steroids were separated using TLC. Silica plates were run in chloroform:ethyl acetate (3:1) for 28 min (two times). Steroids were visualized with primulin and UV light. The bands were scraped off the glass, and steroids were eluted from the silica with methanol (three times). Radioactivity was measured using a liquid scintillation counter (Packard 2200CA Tricarb scintillation counter). The counts per minute were corrected for background and procedural losses and then converted to femtomoles of PROG. Protein content was quantified using the Bradford method. Activity was reported as fmol PROG/mg protein.

### Statistics

Relative changes in gene expression were quantified by the comparative Ct method (see above).  $\Delta$ Ct values were analyzed by ANOVA. *Post hoc* analyses were conducted with Fisher's protected least significant difference (PLSD) tests. For  $3\beta$ -HSD activity assays, results from separate biochemical assays were analyzed with *t* tests. Values of  $P \leq 0.05$  were considered significant.

## Results

### Estrogen-induced mRNA expression in hypothalamus

$\beta$ -Actin mRNA levels were not affected by estrogen treatment (ANOVA,  $F = 0.26$ ,  $P = 0.85$ ), and the Ct values were similar across groups ( $17.53 \pm 0.25$ ,  $17.53 \pm 0.13$ ,  $17.43 \pm 0.26$ , and  $17.31 \pm 0.07$  for 0-, 12-, 24-, and 44-h groups, respectively). Therefore,  $\beta$ -actin mRNA levels were used as the baseline, and all expression data were normalized to  $\beta$ -actin mRNA levels for each subject.

As a positive control for EB action, PR expression was measured using PCR primers that recognized either both PR-A and PR-B (PR-A/B) isoforms or the PR-B isoform only. EB significantly increased PR-A/B mRNA expression (Fig. 1; ANOVA,  $F = 6.80$ ,  $P = 0.003$ ). Compared with the 0-h group, PR-A/B mRNA expression was significantly higher in the 12-, 24-, and 44-h groups (Fisher's PLSD,  $P < 0.05$  in all cases). PR-A/B mRNA levels did not differ significantly among the 12-, 24-, and 44-h groups (Fisher's PLSD,  $P > 0.05$  in all cases). Using PCR primers specific for the PR-B isoform, we also observed an EB-induced increase in PR-B mRNA levels (Fig. 1; ANOVA,  $F = 25.95$ ,  $P < 0.0001$ ). PR-B mRNA expression was significantly higher in the 12-, 24-, and 44-h groups relative to the 0-h group (Fisher's PLSD,  $P < 0.05$  in all cases). PR-B mRNA levels were not different among the 12-, 24-, and 44-h groups (Fisher's PLSD,  $P > 0.05$  in all cases).

Next, we examined mRNAs coding for proteins involved in PROG synthesis (Fig. 2). EB treatment did not significantly affect the expression of mRNA for the two cholesterol carrier proteins, SCP-2 ( $F = 1.11$ ,  $P = 0.37$ ) and StAR ( $F = 0.84$ ,  $P =$

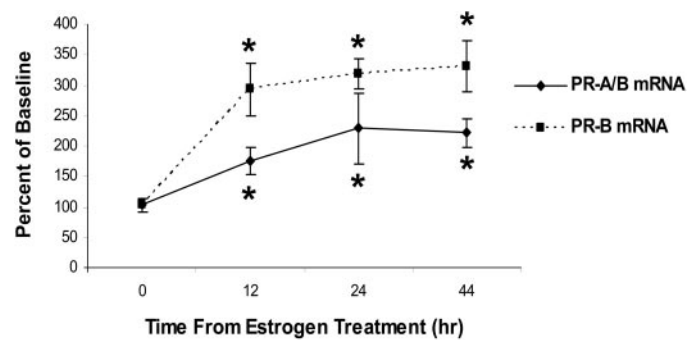

FIG. 1. Effects of estrogen treatment on PR mRNA in the hypothalamus of OVX-ADX rats. Subjects were treated with 50  $\mu$ g EB for 0, 12, 24, or 44 h ( $n = 6, 5, 5,$  and  $5$ , respectively). Primers were designed to recognize both PR-A and PR-B isoforms (PR-A/B) or PR-B only. The mRNA levels were measured by relative quantitative RT-PCR, normalized to  $\beta$ -actin mRNA, and expressed as a percentage of baseline (0-h group). EB treatment significantly increased mRNA levels of PR-A/B and PR-B within 12 h. Levels were not significantly different among 12-, 24-, and 44-h time points. \*, Significantly greater than 0-h group ( $P < 0.05$ , Fisher's PLSD).

0.49). Similarly, EB treatment did not change P450scc mRNA levels during the experimental period ( $F = 1.06$ ,  $P = 0.39$ ). In contrast, EB treatment significantly increased  $3\beta$ -HSD mRNA levels in the hypothalamus (Fig. 2D;  $F = 6.71$ ,  $P = 0.003$ ).  $3\beta$ -HSD mRNA expression was significantly elevated over baseline at both the 24- and 44-h time points after EB treatment (Fisher's PLSD,  $P < 0.05$  in both cases). In addition, the mRNA expression levels of the 24- and 44-h groups were significantly greater than the 12-h group (Fisher's PLSD,  $P < 0.05$  in both cases). The greatest increase in  $3\beta$ -HSD mRNA levels was 143% over baseline at 24 h. The levels were 70% over baseline at 44 h.

### Estrogen increased $3\beta$ -HSD activity in hypothalamus

To verify that an increase in  $3\beta$ -HSD mRNA levels was reflected in enzyme activity, the conversion of [ $^3$ H]pregnenolone to [ $^3$ H]PROG was measured. In the hypothalamus, EB significantly increased  $3\beta$ -HSD activity by 59% at 44 h after treatment (Fig. 3; *t* test,  $t = 2.35$ ,  $P = 0.04$ ). In contrast, in the amygdala, EB had no effect on  $3\beta$ -HSD activity at 44 h (Fig. 3; *t* = 0.60,  $P = 0.56$ ), indicating a region-specific effect of estrogen. To determine whether enzyme activity was increased more quickly than the  $3\beta$ -HSD mRNA levels, the synthesis of PROG was measured 2 h after EB treatment. At 2 h, EB did not significantly affect  $3\beta$ -HSD activity in the hypothalamus ( $t = 1.49$ ,  $P = 0.17$ ) or amygdala ( $t = 0.87$ ,  $P = 0.41$ ).

## Discussion

The major findings of the present experiments are that in the hypothalamus, estrogen treatment increases 1) the conversion of pregnenolone to PROG and 2) the mRNA expression of  $3\beta$ -HSD, the enzyme catalyzing this conversion. These data indicate that peripheral estrogen can regulate local synthesis of PROG in the hypothalamus. Previous results indicated that estrogen treatment of OVX-ADX rats increased PROG levels in the hypothalamus (2), but whether estrogen affected cholesterol transport proteins or steroido-

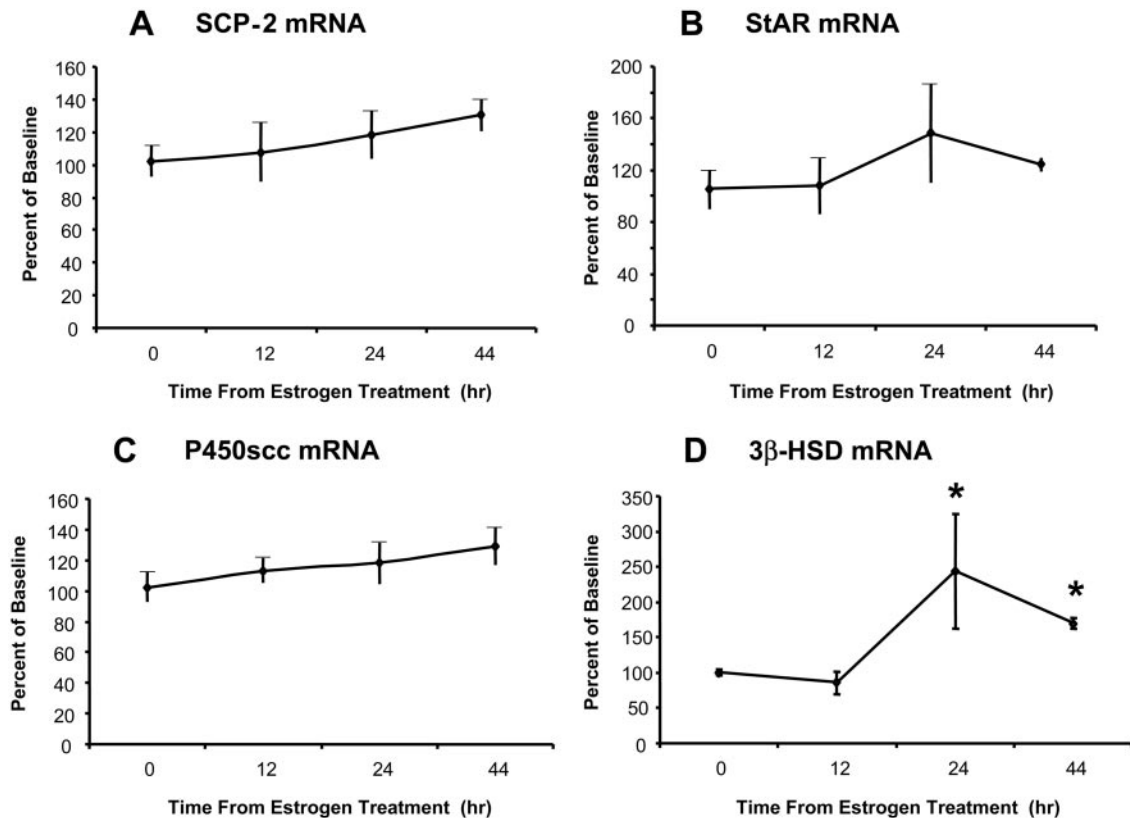

FIG. 2. Effects of estrogen treatment on mRNA levels of SCP-2 (A), StAR (B), P450scc (C), and  $3\beta$ -HSD (D) in the hypothalamus of OVX-ADX rats. Subjects were treated with 50  $\mu$ g EB for 0, 12, 24, or 44 h ( $n = 6, 5, 5,$  and  $5,$  respectively). The mRNA levels were measured by relative quantitative RT-PCR and expressed as a percentage of baseline (0-h group). EB treatment significantly increased  $3\beta$ -HSD mRNA levels ( $F = 6.075, P = 0.003$ ). \*, Significantly greater than 0- and 12-h groups.

genic enzymes was unknown. The present studies indicate that one mechanism through which estrogen increases neuro-PROG levels is by up-regulation of  $3\beta$ -HSD mRNA levels within the brain. This is an important point, because relatively little is known about the regulation of neurosteroids *in vivo*.

In addition to  $3\beta$ -HSD mRNA, we detected the mRNAs for SCP-2, StAR, and P450scc in the adult female hypothalamus.

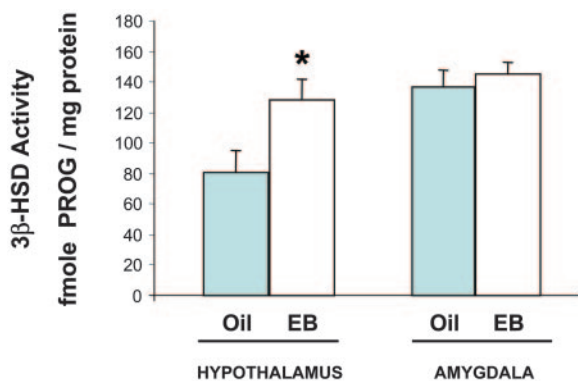

FIG. 3. Effects of estrogen treatment on  $3\beta$ -HSD activity in the hypothalamus and amygdala of OVX-ADX rats. Subjects were treated with 50  $\mu$ g EB ( $n = 6$ ) or oil vehicle ( $n = 5$ ) for 44 h.  $3\beta$ -HSD activity was determined by measuring the *in vitro* conversion of [ $^3$ H]pregnenolone to [ $^3$ H]PROG. \*, Significantly greater than oil-treated controls.

Furthermore, OVX-ADX rats lack an obvious peripheral source of pregnenolone, the substrate for  $3\beta$ -HSD, but OVX-ADX animals have high PROG levels in the hypothalamus after EB treatment. Taken together, the data support the hypothesis that the hypothalamus is able to synthesize PROG *de novo* from cholesterol. Thus, PROG would be a true neurosteroid in this case.

Proteins involved in PROG synthesis, such as SCP-2, StAR, P450scc, and  $3\beta$ -HSD, are present in the brains of a wide variety of vertebrates (17, 22–24). However, little is known about how these proteins are regulated *in vivo* to modify neurosteroid levels. Recent work has emphasized the importance of StAR as a rate-limiting step in steroid production (13); however, the present data point to an additional role for  $3\beta$ -HSD in regulating neuro-PROG concentrations in the hypothalamus. In contrast, in ovarian and placental cells, estrogen facilitation of PROG synthesis may not involve increased P450scc or  $3\beta$ -HSD mRNA (25, 26).

Our previous studies suggest that estrogen induction of neuro-PROG is a critical part of the positive feedback mechanism through which estrogen induces the LH surge (2). According to this hypothesis, estrogen increases the expression of both PR and  $3\beta$ -HSD in the hypothalamus. Therefore, neuro-PROG can activate the newly expressed PR. Activated PRs permit the release of GnRH (27), stimulating the LH surge to regulate ovulation and luteinization of the ruptured follicle. In OVX-ADX rats, estrogen treatment specifically

increases hypothalamic PROG levels after 45 h (earlier time points have not been examined) (2). This increase in hypothalamic PROG occurs before the LH surge, which is 51–53 h after estrogen treatment in our colony (2). In the present studies, estrogen treatment increased hypothalamic PR mRNA within 12 h, 3 $\beta$ -HSD mRNA expression after 24 and 44 h, and 3 $\beta$ -HSD activity after 44 h. These results are consistent with the data on hypothalamic PROG levels and the ability of a 3 $\beta$ -HSD inhibitor to block the LH surge (2). In addition, recent data suggest a role for neuro-PROG in the expression of female reproductive behavior, particularly proceptive behavior (28). Thus, neuro-PROG may be important for the coordination of ovulation and sexual behavior in female rats.

### Acknowledgments

We gratefully acknowledge the technical assistance of Noel Alday and Sarah Hipschman, insightful comments by Dr. Phoebe Dewing, and the support of Dr. John Lu.

Received May 12, 2005. Accepted July 8, 2005.

Address all correspondence and requests for reprints to: Paul Micevych, Department of Neurobiology, David Geffen School of Medicine at University of California, Los Angeles, California 90091-1763. E-mail: pmicevych@mednet.ucla.edu.

This work was supported by National Institutes of Health Grants DA 042635 (to P.E.M.) and MH061994 (to B.A.S.), Canadian Institutes of Health Research (to K.K.S.), and the Michael Smith Foundation for Health Research (to K.K.S.).

### References

- Corpechot C, Robel P, Axelson M, Sjoval J, Baulieu EE 1981 Characterization and measurement of dehydroepiandrosterone sulfate in rat brain. *Proc Natl Acad Sci USA* 78:4704–4707
- Micevych P, Sinchak K, Mills RH, Tao L, LaPolt P, Lu JK 2003 The luteinizing hormone surge is preceded by an estrogen-induced increase of hypothalamic progesterone in ovariectomized and adrenalectomized rats. *Neuroendocrinology* 78:29–35
- Compagnone NA, Mellon SH 2000 Neurosteroids: biosynthesis and function of these novel neuromodulators. *Front Neuroendocrinol* 21:1–56
- Guennoun R, Fiddes RJ, Gouezou M, Lombs M, Baulieu EE 1995 A key enzyme in the biosynthesis of neurosteroids, 3 $\beta$ -hydroxysteroid dehydrogenase/ $\Delta$ 5- $\Delta$ 4-isomerase (3 $\beta$ -HSD), is expressed in rat brain. *Brain Res Mol Brain Res* 30:287–300
- Mellon SH, Deschepper CF 1993 Neurosteroid biosynthesis: genes for adrenal steroidogenic enzymes are expressed in the brain. *Brain Res* 629:283–292
- Compagnone NA, Bulfone A, Rubenstein JL, Mellon SH 1995 Expression of the steroidogenic enzyme P450<sub>scc</sub> in the central and peripheral nervous systems during rodent embryogenesis. *Endocrinology* 136:2689–2696
- Zwain IH, Yen SS 1999 Neurosteroidogenesis in astrocytes, oligodendrocytes, and neurons of cerebral cortex of rat brain. *Endocrinol* 140:3843–3852
- Sinchak K, Mills RH, Tao L, LaPolt P, Lu JK, Micevych P 2003 Estrogen induces de novo progesterone synthesis in astrocytes. *Dev Neurosci* 25:343–348
- Chaban VV, Lakhter AJ, Micevych P 2004 A membrane estrogen receptor mediates intracellular calcium release in astrocytes. *Endocrinology* 145:3788–3795
- Milner TA, McEwen BS, Hayashi S, Li CJ, Reagan LP, Alves SE 2001 Ultrastructural evidence that hippocampal  $\alpha$  estrogen receptors are located at extranuclear sites. *J Comp Neurol* 429:355–371
- Ogi J, Sinchak K, Soma KK, Lu JKH, Micevych P, Estrogen induces progesterone synthesis in hypothalamic astrocytes through an increase of intracellular calcium levels. Society for Neuroscience Abstract, San Diego, CA, 2004, 886.7.
- Myers-Payne SC, Fontaine RN, Loeffler A, Pu L, Rao AM, Kier AB, Wood WG, Schroeder F 1996 Effects of chronic ethanol consumption on sterol transfer proteins in mouse brain. *J Neurochem* 66:313–320
- King SR, Manna PR, Ishii T, Syapin PJ, Ginsberg SD, Wilson K, Walsh LP, Parker KL, Stocco DM, Smith RG, Lamb DJ 2002 An essential component in steroid synthesis, the steroidogenic acute regulatory protein, is expressed in discrete regions of the brain. *J Neurosci* 22:10613–10620
- Sierra A, Lavaque E, Perez-Martin M, Azcoitia I, Hales DB, Garcia-Segura LM 2003 Steroidogenic acute regulatory protein in the rat brain: cellular distribution, developmental regulation and overexpression after injury. *Eur J Neurosci* 18:1458–1467
- Scott RE, Wu-Peng XS, Pfaff DW 2002 Regulation and expression of progesterone receptor mRNA isoforms A and B in the male and female rat hypothalamus and pituitary following oestrogen treatment. *J Neuroendocrinol* 14:175–183
- Okada A, Ohta Y, Buchanan D, Sato T, Iguchi T 2002 Effect of estrogens on ontogenetic expression of progesterone receptor in the fetal female rat reproductive tract. *Mol Cell Endocrinol* 195:55–64
- Soma KK, Alday NA, Hau M, Schlinger BA 2004 Dehydroepiandrosterone metabolism by 3 $\beta$ -hydroxysteroid dehydrogenase/ $\Delta$ 5- $\Delta$ 4 isomerase in adult zebra finch brain: sex difference and rapid effect of stress. *Endocrinology* 145:1668–1677
- Weidenfeld J, Siegel RA, Chowers I 1980 In vitro conversion of pregnenolone to progesterone by discrete brain areas of the male rat. *J Steroid Biochem* 13:961–963
- Vanson A, Arnold AP, Schlinger BA 1996 3 $\beta$ -Hydroxysteroid dehydrogenase/isomerase and aromatase activity in primary cultures of developing zebra finch telencephalon: dehydroepiandrosterone as substrate for synthesis of androstenedione and estrogens. *Gen Comp Endocrinol* 102:342–350
- Coirini H, Gouezou M, Delespierre B, Liere P, Pianos A, Eychenne B, Schumacher M, Guennoun R 2003 Characterization and regulation of the 3 $\beta$ -hydroxysteroid dehydrogenase isomerase enzyme in the rat sciatic nerve. *J Neurochem* 84:119–126
- Coirini H, Gouezou M, Delespierre B, Schumacher M, Guennoun R 2003 3 $\beta$ -Hydroxysteroid dehydrogenase isomerase (3 $\beta$ -HSD) activity in the rat sciatic nerve: kinetic analysis and regulation by steroids. *J Steroid Biochem Mol Biol* 85:89–94
- Mensah-Nyagan AG, Do-Rego JL, Beaujean D, Luu-The V, Pelletier G, Vaudry H 1999 Neurosteroids: expression of steroidogenic enzymes and regulation of steroid biosynthesis in the central nervous system. *Pharmacol Rev* 51:63–81
- Tsutsui K, Ukena K, Takase M, Kohchi C, Lea RW 1999 Neurosteroid biosynthesis in vertebrate brains. *Comp Biochem Physiol C Pharmacol Toxicol Endocrinol* 124:121–129
- Ibanez C, Guennoun R, Liere P, Eychenne B, Pianos A, El-Etr M, Baulieu EE, Schumacher M 2003 Developmental expression of genes involved in neurosteroidogenesis: 3 $\beta$ -hydroxysteroid dehydrogenase/ $\Delta$ 5- $\Delta$ 4 isomerase in the rat brain. *Endocrinology* 144:2902–2911
- Babishkin JS, Grimes RW, Pepe GJ, Albrecht ED 1997 Estrogen stimulation of P450 cholesterol side-chain cleavage activity in cultures of human placental syncytiotrophoblasts. *Biol Reprod* 56:272–278
- Rodway MR, Swan CL, Crellin NK, Gillio-Meina C, Chedrese PJ 1999 Steroid regulation of progesterone synthesis in a stable porcine granulosa cell line: a role for progestins. *J Steroid Biochem Mol Biol* 68:173–180
- Chappell PE, Levine JE 2000 Stimulation of gonadotropin-releasing hormone surges by estrogen. I. Role of hypothalamic progesterone receptors. *Endocrinology* 141:1477–1485
- Mills RH, Sinchak K, Mann DM, R, Wright R, Micevych P, 2003 Neuroprogesterone regulation of female reproductive behavior. Society for Neuroscience Abstract, New Orleans, LA, 726.10
